1 **Human knockouts in a cohort with a high rate of consanguinity**

2

3 Danish Saleheen<sup>1,2,†\*</sup>, Pradeep Natarajan<sup>3,4,†</sup>, Wei Zhao<sup>1</sup>, Asif Rasheed<sup>2</sup>, Sumeet  
4 Khetarpal<sup>5</sup>, Hong-Hee Won<sup>3,4</sup>, Konrad J. Karczewski<sup>4,6</sup>, Anne H. O'Donnell-Luria<sup>4,6,7</sup>,  
5 Kaitlin E. Samocha<sup>6</sup>, Namrata Gupta<sup>4</sup>, Mozzam Zaidi<sup>2</sup>, Maria Samuel<sup>2</sup>, Atif Imran<sup>2</sup>,  
6 Shahid Abbas<sup>8</sup>, Faisal Majeed<sup>2</sup>, Madiha Ishaq<sup>2</sup>, Saba Akhtar<sup>2</sup>, Kevin Trindade<sup>5</sup>, Megan  
7 Mucksavage<sup>5</sup>, Nadeem Qamar<sup>9</sup>, Khan Shah Zaman<sup>9</sup>, Zia Yaqoob<sup>9</sup>, Tahir Saghir<sup>9</sup>, Syed  
8 Nadeem Hasan Rizvi<sup>9</sup>, Anis Memon<sup>9</sup>, Nadeem Hayyat Mallick<sup>10</sup>, Mohammad Ishaq<sup>11</sup>,  
9 Syed Zahed Rasheed<sup>11</sup>, Fazal-ur-Rehman Memon<sup>12</sup>, Khalid Mahmood<sup>13</sup>, Naveeduddin  
10 Ahmed<sup>14</sup>, Ron Do<sup>15,16</sup>, Daniel G. MacArthur<sup>4,6</sup>, Stacey Gabriel<sup>4</sup>, Eric S. Lander<sup>4</sup>, Mark J.  
11 Daly<sup>4,6</sup>, Philippe Frossard<sup>2,†</sup>, John Danesh<sup>17,18,†</sup>, Daniel J. Rader<sup>5,19,†</sup>, Sekar  
12 Kathiresan<sup>3,4,†\*</sup>

13

14 †Contributed equally

15

16 <sup>1</sup> Department of Biostatistics and Epidemiology, Perelman School of Medicine at the  
17 University of Pennsylvania, Philadelphia, PA, USA

18 <sup>2</sup> Center for Non-Communicable Diseases, Karachi, Pakistan

19 <sup>3</sup> Center for Human Genetic Research and Cardiovascular Research Center,  
20 Massachusetts General Hospital, Boston, MA, USA

21 <sup>4</sup> Broad Institute of Harvard and MIT, Cambridge, MA, USA

22 <sup>5</sup> Division of Translational Medicine and Human Genetics, Department of Medicine,

23 Perelman School of Medicine at the University of Pennsylvania, Philadelphia, PA, USA

- 24 <sup>6</sup> Analytic and Translational Genetics Unit, Department of Medicine, Massachusetts  
25 General Hospital and Harvard Medical School, Boston, MA
- 26 <sup>7</sup> Division of Genetics and Genomics, Boston Children's Hospital, Boston, MA, USA
- 27 <sup>8</sup> Faisalabad Institute of Cardiology, Faisalabad, Pakistan
- 28 <sup>9</sup> National Institute of Cardiovascular Disorders, Karachi, Pakistan
- 29 <sup>10</sup> Punjab Institute of Cardiology, Lahore, Pakistan
- 30 <sup>11</sup> Karachi Institute of Heart Diseases, Karachi, Pakistan
- 31 <sup>12</sup> Red Crescent Institute of Cardiology, Hyderabad, Pakistan
- 32 <sup>13</sup> The Civil Hospital, Karachi, Pakistan
- 33 <sup>14</sup> Liaquat National Hospital, Karachi, Pakistan
- 34 <sup>15</sup> Department of Genetics and Genomic Sciences, Mount Sinai Medical Center, Icahn  
35 School of Medicine at Mount Sinai, New York, NY, USA
- 36 <sup>16</sup> The Charles Bronfman Institute of Personalized Medicine, Icahn School of Medicine at  
37 Mount Sinai, New York, NY, USA
- 38 <sup>17</sup> Department of Public Health and Primary Care, University of Cambridge, UK
- 39 <sup>18</sup> Wellcome Trust Sanger Institute, Hinxton, Cambridge, UK
- 40 <sup>19</sup> Department of Human Genetics, University of Pennsylvania, USA
- 41
- 42 \*Corresponding authors:
- 43 Danish Saleheen, MBBS, PhD  
44 Department of Biostatistics and Epidemiology  
45 University of Pennsylvania  
46 11-134 Translational Research Center

47 3400 Civic Center Boulevard  
48 Philadelphia, PA 19104  
49 Tel: 215-573-6323  
50 Fax: 215-573-2094  
51 Email: [saleheen@mail.med.upenn.edu](mailto:saleheen@mail.med.upenn.edu)  
52  
53 Sekar Kathiresan, MD  
54 Broad Institute and Massachusetts General Hospital  
55 CPZN 5.252  
56 185 Cambridge Street  
57 Boston, MA 02114  
58 Tel: 617-643-6120  
59 Email: [sekar@broadinstitute.org](mailto:sekar@broadinstitute.org)  
60  
61 Word Count, Summary Paragraph: 253  
62 Word Count, Main Text: 1,977

## 63 **Summary Paragraph**

64 A major goal of biomedicine is to understand the function of every gene in the human  
65 genome.<sup>1</sup> Null mutations can disrupt both copies of a given gene in humans and  
66 phenotypic analysis of such ‘human knockouts’ can provide insight into gene function.  
67 To date, comprehensive analysis of genes knocked out in humans has been limited by the  
68 fact that null mutations are infrequent in the general population and so, observing an  
69 individual homozygous null for a given gene is exceedingly rare.<sup>2,3</sup> However,  
70 consanguineous unions are more likely to result in offspring who carry homozygous null  
71 mutations. In Pakistan, consanguinity rates are notably high.<sup>4</sup> Here, we sequenced the  
72 protein-coding regions of 7,078 adult participants living in Pakistan and performed  
73 phenotypic analysis to identify homozygous null individuals and to understand  
74 consequences of complete gene disruption in humans. We enumerated 36,850 rare (<1 %  
75 minor allele frequency) null mutations. These homozygous null mutations led to  
76 complete inactivation of 961 genes in at least one participant. Homozygosity for null  
77 mutations at *APOC3* was associated with absent plasma apolipoprotein C-III levels; at  
78 *PLAG27*, with absent enzymatic activity of soluble lipoprotein-associated phospholipase  
79 *A2*; at *CYP2F1*, with higher plasma interleukin-8 concentrations; and at either *A3GALT2*  
80 or *NRG4*, with markedly reduced plasma insulin C-peptide concentrations. After  
81 physiologic challenge with oral fat, *APOC3* knockouts displayed marked blunting of the  
82 usual post-prandial rise in plasma triglycerides compared to wild-type family members.  
83 These observations provide a roadmap to understand the consequences of complete  
84 disruption of a large fraction of genes in the human genome.

## 85 Main Text

86 We studied adult participants in the Pakistan Risk of Myocardial Infarction Study  
87 (PROMIS) designed to understand the determinants of cardiometabolic diseases in South  
88 Asians.<sup>5</sup> Consanguineous marriages have been common in this region of South Asia for  
89 many generations.<sup>6</sup> In PROMIS, 38.3% of participants reported that their parents were  
90 cousins and 38.1% reported themselves being married to a cousin. An expectation from  
91 consanguinity is long regions of autozygosity, defined as homozygous loci identical by  
92 descent.<sup>7</sup> Using genome-wide genotyping data available in 17,744 PROMIS participants,  
93 we quantified the length of runs of homozygosity, defined as homozygous segments at  
94 least 1.5 megabases long. We compared the lengths of runs of homozygosity among  
95 PROMIS participants with that seen in other populations from the International HapMap3  
96 project. Median length of genome-wide homozygosity among PROMIS participants was  
97 6-7 times higher than participants of European (CEU, TSI) ( $P = 3.6 \times 10^{-37}$ ), East Asian  
98 (CHB, JPT, CHD) ( $P = 5.4 \times 10^{-48}$ ) and African ancestries (YRI, MKK) ( $P = 1.3 \times 10^{-40}$ ),  
99 respectively (**Fig. 1**).

100 In order to characterize the burden of rare homozygous null alleles, we performed  
101 whole exome sequencing in 7,078 PROMIS participants (**Table 1**). Across all  
102 participants, 1,303,689 protein-coding and splice-site sequence variants in 20,008  
103 autosomal genes passed variant quality control metrics. Of these, 47,656 mutations across  
104 13,645 autosomal genes were annotated as null (nonsense, frameshift, or canonical  
105 splice-site). To increase the probability that mutations annotated as null are *bona fide*, we  
106 removed nonsense and frameshift mutations occurring within the last 5% of the transcript  
107 and within exons flanked by non-canonical splice sites, splice site mutations at small

108 (<15 bp) introns, at non-canonical splice sites, and where the purported null allele is  
109 observed across primates. Common null alleles are less likely to exert strong functional  
110 effects as they are less constrained by purifying selection; thus, we limit our analyses in  
111 the rest of the manuscript to null mutations with a minor allele frequency (MAF) of <  
112 1%.

113 Applying these criteria, we generated a set of 36,850 null mutations across 12,131  
114 autosomal genes.<sup>8</sup> The site-frequency spectrum for these null mutations revealed that the  
115 majority was seen only in one or a few individuals (**Fig. 2**).

116 We compared the coefficient of inbreeding (F coefficient) in PROMIS  
117 participants with that of 15,249 individuals from outbred populations of European or  
118 African American ancestry. The F coefficient estimates the excess homozygosity  
119 compared with an estimated outbred ancestor. PROMIS participants had a 4-fold higher  
120 median inbreeding coefficient compared to outbred populations (0.016 v 0.0041;  $P < 2 \times$   
121  $10^{-16}$ ) (**Fig. 3A**). Additionally, those in PROMIS who reported that their parents were  
122 closely related had even higher median inbreeding coefficients than those who did not  
123 (0.024 v 0.013;  $P < 2 \times 10^{-16}$ ).

124 Across all 7,078 PROMIS participants, both copies of 961 distinct genes were  
125 disrupted due to null mutations with MAF < 1%. A full listing of all 961 genes knocked  
126 out, the number of knockout participants for each gene, and the specific null mutation(s)  
127 are provided in **Supplementary Table 1**. 697 (72.5 %) of the genes were knocked out  
128 only in one participant (**Supplementary Figure 1**). About 1 in 5 sequenced participants  
129 (1,306 individuals, 18.4 %) had at least one gene knocked by a homozygous null  
130 mutation with MAF < 1%. 1,081 of these 1,306 individuals (82.8 %) had complete

131 deficiency for one gene, but a minority of participants were knockouts for more than one  
132 gene and one participant had six genes completely inactivated. The F inbreeding  
133 coefficient was correlated with the number of homozygous null genes present in each  
134 individual. (Spearman  $r = 0.29$ ;  $P = 3 \times 10^{-133}$ ) (**Fig. 3B**).

135 We tested the hypothesis that genes observed in the homozygous null state in  
136 PROMIS participants are under less evolutionary constraint. We calculated the  
137 probability of being loss-of-function intolerant (at >90% threshold) for each gene (see  
138 Methods)<sup>9,10</sup> and compared this to 961 randomly selected genes. The observed 961  
139 homozygous null genes were less likely to be classified as highly constrained (odds ratio  
140 0.10; 95% CI 0.095, 0.11;  $P < 1 \times 10^{-10}$ ).

141 We next sought to understand the phenotypic consequences of complete  
142 disruption of any of these 961 genes. We applied two approaches. First, for 264 genes  
143 where two or more participants were homozygous null, we conducted an association  
144 screen against a panel of 201 phenotypic traits (**Supplementary Table 2**). Second, at a  
145 single gene, we recalled participants based on genotype across three classes ('wild-type',  
146 heterozygous null, and homozygous null) and performed provocative physiologic testing.

147 At 264 genes where two or more participants were homozygous null, we  
148 performed association analyses to determine whether homozygous null mutation status  
149 was associated with variation in any of 201 traits. For quantitative traits, we compared  
150 mean trait values in homozygous null carriers with non-carriers. For dichotomous traits,  
151 we performed logistic regression with trait status as the outcome variable and  
152 homozygous null carrier status as the predictor variable. Details of covariate adjustments  
153 are presented in the Methods. Across quantitative and dichotomous traits, this resulted in

154 the analysis of 15,263 gene-trait pairs and thus, we set Bonferroni-adjusted significance  
155 threshold at  $P = 3 \times 10^{-6}$ .

156 The quantile-quantile plot of expected versus observed association results shows  
157 an excess of highly significant results without systematic inflation (**Supplementary**  
158 **Figure 2**). Association results surpassed the Bonferroni significance threshold for 14  
159 gene-trait pairs (**Supplementary Table 3**). Below, we highlight four associations  
160 demonstrating examples of 1) confirmed biochemical deficiency with two independent  
161 assays (*PLA2G7*), 2) gene-biomarker association (*CYP2F1*), 3) pure recessive model of  
162 association (*A3GALT2*), and 4) confirmed biochemical deficiency with gene-biomarker  
163 association (*APOC3*).

164 Lipoprotein-associated phospholipase A2 (Lp-PLA2, encoded by *PLA2G7*)  
165 hydrolyzes oxidatively-modified polyunsaturated fatty acids producing  
166 lysophosphatidylcholine and oxidized nonesterified fatty acids. Higher soluble Lp-PLA2  
167 activity has been correlated with higher risk for cardiovascular disease.<sup>11</sup> At *PLA2G7*, we  
168 identified two participants homozygous for *PLA2G7* c.663+1G>A. When compared with  
169 non-carriers, c.663+1G>A homozygotes have markedly lower Lp-PLA2 enzyme as well  
170 as activity (-266 ng/ml,  $P = 7 \times 10^{-5}$  for mass; -245 nmol/ml/min,  $P = 2 \times 10^{-7}$  for  
171 activity) whereas the 102 heterozygotes had an intermediate effect (-107 ng/ml,  $P = 4 \times$   
172  $10^{-26}$  for mass; -115 nmol/ml/min,  $P = 3 \times 10^{-58}$  for activity) (**Supplementary Figure 3a-**  
173 **b**).

174 Cytochrome P450 2F1 (encoded by *CYP2F1*) is primarily expressed in the lung  
175 and metabolizes pulmonary-selective toxins, such as cigarette smoke, and thus,  
176 modulates the expression of environmentally-associated pulmonary diseases.<sup>12</sup> At



177 *CYP2F1*, we identified two participants homozygous for a splice-site mutation, c.1295-  
178 2A>G. When compared with non-carriers, c.1295-2A>G homozygotes displayed higher  
179 soluble interleukin 8 concentrations (+40.3 %;  $P = 3 \times 10^{-6}$ ) (**Supplementary Figure 4**).  
180 *CYP2F1* c.1295-2A>G heterozygotes (n = 3 assayed for interleukin 8) had a more modest  
181 effect (+10.7 %;  $P = 2 \times 10^{-4}$ ). Interleukin 8 is a mediator of acute pulmonary  
182 inflammation.<sup>13</sup>

183         Alpha-1,3-galactosyltransferase 2 (encoded by *A3GALT2*) catalyzes the formation  
184 of the Gal- $\alpha$ 1-3Gal $\beta$ 1-4GlcNAc-R ( $\alpha$ -gal) epitope; the biological role of this enzyme in  
185 humans is uncertain.<sup>14</sup> At *A3GALT2*, we identified two participants homozygous for a  
186 frameshift mutation, p.Thr106SerfsTer4. Compared with non-carriers, p.Thr106SerfsTer4  
187 homozygotes had both reduced fasting insulin C-peptide (-97.4%;  $P = 6 \times 10^{-12}$ ) as well  
188 as total fasting insulin concentrations (-91.9%;  $P = 1 \times 10^{-4}$ ). Such an association was  
189 only observed in the homozygous state (**Supplementary Figure 5**). *A3galt2*<sup>-/-</sup> mice and  
190 pigs have recently been shown to have glucose intolerance.<sup>15,16</sup>

191         To understand if the identification of only a single homozygote in PROMIS may  
192 still be informative, we performed a complementary analysis, focusing on those with the  
193 most extreme standard Z scores ( $|Z \text{ score}| > 5$ ) and requiring that there be evidence for  
194 association in heterozygotes as well (see Methods). This procedure highlighted neureglin  
195 4 (NRG4), a member of the epidermal growth factor family extracellular ligands which is  
196 highly expressed in brown fat, particularly during adipocyte differentiation.<sup>17,18</sup> At *NRG4*,  
197 we identified a single participant homozygous for a frameshift mutation,  
198 p.Ile75AsnfsTer23, who had nearly absent fasting insulin C-peptide concentrations (-99.3  
199 %;  $P = 7 \times 10^{-11}$ ). When compared with non-carriers, heterozygotes for *NRG4*

200 p.Ile75AsnfsTer23 (n = 7) displayed 54.5 % reduction in insulin C-peptide ( $P = 6 \times 10^{-3}$ ).

201 Mice homozygous deleted for *Nrg4* have recently been shown to have glucose

202 intolerance.<sup>18</sup>

203 Apolipoprotein C-III (apoC-III, encoded by *APOC3*) is a major protein

204 component of chylomicrons, very low-density lipoprotein cholesterol, and high-density

205 lipoprotein cholesterol.<sup>19</sup> We and others recently reported that null mutations in

206 heterozygous form lower plasma triglycerides as well as risk for coronary heart

207 disease.<sup>20,21</sup> In both published studies, no *APOC3* homozygotes were identified despite

208 study of nearly 200,000 participants from the U.S. and Europe. However, in this study of

209 about 7,000 Pakistanis, we identified four participants homozygous for *APOC3*

210 p.Arg19Ter. When compared with non-carriers, p.Arg19Ter homozygotes displayed

211 near-absent plasma apoC-III protein (-89.4 %,  $P = 5 \times 10^{-24}$ ), lower plasma triglyceride

212 concentrations (-61.7 %,  $P = 4 \times 10^{-4}$ ), higher high-density lipoprotein (HDL) cholesterol

213 (+28.1 mg/dL,  $P = 6 \times 10^{-9}$ ); and similar levels of low-density lipoprotein (LDL)

214 cholesterol ( $P = 0.11$ ) (**Fig. 4a-d**).

215 ApoC-III functions as a brake on the metabolism of dietary fat and thus, the

216 complete lack of this protein should promote handling of ingested fat. The availability of

217 humans completely deficient in *APOC3* allowed us to test this hypothesis directly. We re-

218 contacted one homozygous null proband, his wife, and 27 of his first-degree relatives for

219 genotyping and physiologic investigation. Surprisingly, we found that the proband's wife

220 was also a null homozygote, leading to all nine children being obligate homozygotes

221 (**Fig. 4e**). In this family, we challenged homozygotes (n = 6) and non-carriers (n = 7) with

222 a 50 g/m<sup>2</sup> oral fat load followed by serial blood testing for six hours. *APOC3* p.Arg19Ter

223 carriers had significantly lower post-prandial triglyceride excursions (triglycerides area  
224 under the curve 468.3 mg/dL\*6 hours vs 1267.7 mg/dL\*6 hours;  $P = 1 \times 10^{-4}$ ) (**Fig. 4f**).  
225 These data show that complete lack of APOC3 markedly improves clearance of plasma  
226 triglycerides after a fatty meal.

227 Gene disruption in model organisms followed by phenotypic analysis has been a  
228 fruitful approach to understand gene function; here, we extend this concept to the human  
229 organism, leveraging naturally-occurring null mutations, consanguinity, and extensive  
230 biochemical phenotyping. These results permit several conclusions.

231 First, power to identify human knockouts is improved with the study of  
232 populations with high degrees of consanguinity. Using the observed median inbreeding  
233 coefficient of sequenced participants, we estimate that with the sequencing of 200,000  
234 Pakistanis, about 8,754 genes (95% CI, 8,669-8,834) will be completely knocked out in at  
235 least one participant (**Fig. 5**). In contrast, with the sequencing of a similar number of  
236 outbred individuals of European, East Asian, or African American ancestries, the  
237 expected number of genes knocked out is much less at 1,382 (95% CI, 1,339-1,452),  
238 1,423 (95% CI, 1,388-1,457), and 1,822 (95% CI, 1,772-1,871), respectively (minor  
239 allele frequency estimates obtained from the Exome Aggregation Consortium, manuscript  
240 submitted in parallel). Thus, if a similar number of individuals were sequenced across  
241 different ancestries, the number of genes completely knocked out would be nearly six-  
242 fold higher in Pakistanis when compared with other outbred populations. For example,  
243 among >100,000 participants in Iceland, 1107 homozygous null genes were identified  
244 whereas we observe nearly the same number of null genes after analysis of about 7,000  
245 Pakistanis.<sup>3</sup>

246           Second, dense phenotyping can uncover a range of phenotypic consequences from  
247 complete disruption of a gene as observed for *PLA2G7*, *CYP2F1*, *A3GALT2* and *NRG4*.  
248 Third, recall of complete human knockouts followed by provocative testing may provide  
249 physiologic insights. We used this approach to demonstrate that complete lack of  
250 apolipoprotein C-III is tolerated and results in both lowered fasting triglyceride  
251 concentrations as well as blunted post-prandial lipemia. Finally, to date, most human  
252 genetic studies have pursued a phenotype-first (“forward” genetics) approach, beginning  
253 with traits of interest followed by genetic mapping. Here, we show that it is now possible  
254 to pursue a systematic genotype-first (“reverse” genetics) approach, starting with  
255 homozygous null humans followed by methodical examination of a diverse set of traits.  
256

257 **Methods**

258 **General overview of the Pakistan Risk for Myocardial Infarction Study (PROMIS).**

259 The PROMIS study is designed to investigate determinants of cardiometabolic diseases  
260 in Pakistan. Since 2005, the study has enrolled close to 38,000 participants; the present  
261 investigation included 7,078 participants. Participants aged 30-80 years were enrolled  
262 from nine recruitment centers based in five major urban cities in Pakistan. Type 2  
263 diabetes in the study was defined based on self-report or fasting glucose levels >125  
264 mg/dL or HbA1c > 6.5 % or use of glucose lowering medications. The study was  
265 approved by the institutional review board at the Center for Non-Communicable Diseases  
266 (IRB: 00007048, IORG0005843, FWAS00014490) and all participants gave informed  
267 consent.

268

269 **Phenotype descriptions.**

270 Non-fasting blood samples (with the time since last meal recorded) were drawn and  
271 centrifuged within 45 minutes of venipuncture. Serum, plasma and whole blood samples  
272 were stored at -70°C within 45 minutes of venipuncture. All samples were transported on  
273 dry ice to the central laboratory at the Center for Non-Communicable Diseases (CNCD),  
274 Pakistan, where serum and plasma samples were aliquoted across 10 different storage  
275 vials. Samples were stored at -70°C for any subsequent laboratory analyses. All  
276 biochemical assays were conducted in automated auto-analyzers. At CNCD Pakistan,  
277 measurements for total-cholesterol, HDL cholesterol, LDL cholesterol, triglycerides, and  
278 creatinine were made in serum samples using enzymatic assays; whereas levels of HbA1c  
279 were measured using a turbidimetric assay in whole-blood samples (Roche Diagnostics,

280 USA). For further measurements, aliquots of serum and plasma samples were transported  
281 on dry ice to the Smilow Research Center, University of Pennsylvania, USA, where  
282 following biochemical assays were conducted: apolipoproteins (apoA-I, apoA-II, apoB,  
283 apoC-III, apoE) and non-esterified fatty acids were measured through  
284 immunoturbidometric assays using kits by Roche Diagnostics or Kamiya; lipoprotein (a)  
285 levels were determined through a turbidimetric assay using reagents and calibrators from  
286 Denka Seiken (Niigata, Japan); LpPLA2 mass and activity levels were determined using  
287 immunoassays manufactured by diaDexus (San Francisco, CA, USA); measurements for  
288 insulin, leptin and adiponectin were made using radio-immunoassays by LINCO (MO,  
289 USA); levels of adhesion molecules (ICAM-1, VCAM-1, P- and E-Selectin) were  
290 determined through enzymatic assays by R&D (Minneapolis, MN, USA); and  
291 measurements for C-reactive protein, alanine transaminase, aspartate transaminase,  
292 cystatin-C, ferritin, ceruloplasmin, thyroid stimulating hormone, alkaline phosphatase,  
293 sodium, potassium, chloride, phosphate, sex-hormone binding globulin were made using  
294 enzymatic assays manufactured by Abbott Diagnostics (NJ, USA). Glomerular filtration  
295 rate (eGFR) was estimated from serum creatinine levels using the MDRD equation.  
296 ApoC-III levels were determined in an autoanalyzer using a commercially available  
297 ELISA by Sekisui Diagnostics (Lexington, USA). We also measured the following 52  
298 protein biomarkers by multiplex immunoassay using a customised panel on the Luminex  
299 100/200 instrument by RBM (Myriad Rules Based Medicine, Austin, TX, USA): fatty  
300 acid binding protein, granulocyte monocyte colony stimulating factor, granulocyte colony  
301 stimulating factor, interferon gamma, interleukin-1 beta, interleukin 1 receptor,  
302 interleukin 2, interleukin 3, interleukin 4, interleukin 5, interleukin 6, interleukin 7,

303 interleukin 8, interleukin 10, interleukin 18, interleukin p40, interleukin p70, interleukin  
304 15, interleukin 17, interleukin 23, macrophage inflammatory protein 1 alpha, macrophage  
305 inflammatory protein 1 beta, malondialdehyde-modified LDL, matrix metalloproteinase  
306 2, matrix metalloproteinase 3, matrix metalloproteinase 9, nerve growth factor beta,  
307 tumor necrosis factor alpha, tumor necrosis factor beta, brain-derived neurotrophic factor,  
308 CD40, CD40 ligand, eotaxin, factor VII, insulin-like growth factor 1, lecithin-type  
309 oxidized LDL receptor 1, monocyte chemoattractant protein 1, myeloperoxidase, N-  
310 terminal prohormone of brain natriuretic peptide, neuronal cell adhesion molecule,  
311 pregnancy-associated plasma protein A, soluble receptor for advanced glycation end-  
312 products, sortilin, stem cell factor, stromal cell-derived factor 1, thrombomodulin, S100  
313 calcium binding protein B, and vascular endothelial growth factor.

314

315 **Laboratory methods for array-based genotyping.**

316 As previously described, a genomewide association scan was performed using the  
317 Illumina 660 Quad array at the Wellcome Trust Sanger Institute (Hinxton, UK) and using  
318 the Illumina HumanOmniExpress at Cambridge Genome Services, UK.<sup>22</sup> Initial quality  
319 control (QC) criteria included removal of participants or single nucleotide  
320 polymorphisms (SNPs) that had a missing rate >5%. SNPs with a MAF <1% and a P-  
321 value of <math>10^{-7}</math> for the Hardy-Weinberg equilibrium test were also excluded from the  
322 analyses. In PROMIS, further QC included removal of participants with discrepancy  
323 between their reported sex and genetic sex determined from the X chromosome. To  
324 identify sample duplications, unintentional use of related samples (cryptic relatedness)

325 and sample contamination (individuals who seem to be related to nearly everyone in the  
326 sample), identity-by-descent (IBD) analyses were conducted in PLINK.<sup>23</sup>

327

328 **Laboratory methods for exome sequencing.**

329 **Exome sequencing.** Exome sequencing was performed at the Broad Institute.

330 Sequencing and exome capture methods have been previously described.<sup>24,25</sup> A brief  
331 description of the methods is provided below.

332 **Receipt/quality control of sample DNA.** Samples were shipped to the Biological  
333 Samples Platform laboratory at the Broad Institute of MIT and Harvard (Cambridge, MA,  
334 USA). DNA concentration was determined by PicoGreen (Invitrogen; Carlsbad, CA,  
335 USA) prior to storage in 2D-barcoded 0.75 ml Matrix tubes at -20 °C in the SmarTStore  
336 (RTS, Manchester, UK) automated sample handling system. Initial quality control (QC)  
337 on all samples involving sample quantification (PicoGreen), confirmation of high-  
338 molecular weight DNA and fingerprint genotyping and gender determination (Illumina  
339 iSelect; Illumina; San Diego, CA, USA). Samples were excluded if the total mass,  
340 concentration, integrity of DNA or quality of preliminary genotyping data was too low.

341 **Library construction.** Library construction was performed as previously described<sup>26</sup>,  
342 with the following modifications: initial genomic DNA input into shearing was reduced  
343 from 3µg to 10-100ng in 50µL of solution. For adapter ligation, Illumina paired end  
344 adapters were replaced with palindromic forked adapters, purchased from Integrated  
345 DNA Technologies, with unique 8 base molecular barcode sequences included in the  
346 adapter sequence to facilitate downstream pooling. With the exception of the palindromic  
347 forked adapters, the reagents used for end repair, A-base addition, adapter ligation, and



348 library enrichment PCR were purchased from KAPA Biosciences (Wilmington, MA,  
349 USA) in 96-reaction kits. In addition, during the post-enrichment SPRI cleanup, elution  
350 volume was reduced to 20  $\mu$ L to maximize library concentration, and a vortexing step  
351 was added to maximize the amount of template eluted.

352 **In-solution hybrid selection.** 1,973 samples underwent in-solution hybrid selection as  
353 previously described<sup>26</sup>, with the following exception: prior to hybridization, two  
354 normalized libraries were pooled together, yielding the same total volume and  
355 concentration specified in the publication. 5,263 samples underwent hybridization and  
356 capture using the relevant components of Illumina's Rapid Capture Exome Kit and  
357 following the manufacturer's suggested protocol, with the following exceptions: first, all  
358 libraries within a library construction plate were pooled prior to hybridization, and  
359 second, the Midi plate from Illumina's Rapid Capture Exome Kit was replaced with a  
360 skirted PCR plate to facilitate automation. All hybridization and capture steps were  
361 automated on the Agilent Bravo liquid handling system.

362 **Preparation of libraries for cluster amplification and sequencing.** Following post-  
363 capture enrichment, libraries were quantified using quantitative PCR (KAPA Biosystems)  
364 with probes specific to the ends of the adapters. This assay was automated using  
365 Agilent's Bravo liquid handling platform. Based on qPCR quantification, libraries were  
366 normalized to 2nM and pooled by equal volume using the Hamilton Starlet. Pools were  
367 then denatured using 0.1 N NaOH. Finally, denatured samples were diluted into strip  
368 tubes using the Hamilton Starlet.

369 **Cluster amplification and sequencing.** Cluster amplification of denatured templates  
370 was performed according to the manufacturer's protocol (Illumina) using HiSeq v3

371 cluster chemistry and HiSeq 2000 or 2500 flowcells. Flowcells were sequenced on HiSeq  
372 2000 or 2500 using v3 Sequencing-by-Synthesis chemistry, then analyzed using RTA  
373 v.1.12.4.2. Each pool of whole exome libraries was run on paired 76bp runs, with and 8  
374 base index sequencing read was performed to read molecular indices, across the number  
375 of lanes needed to meet coverage for all libraries in the pool.

376 **Read mapping and variant discovery.** Samples were processed from real-time base-  
377 calls (RTA v.1.12.4.2 software [Bustard], converted to qseq.txt files, and aligned to a  
378 human reference (hg19) using Burrows–Wheeler Aligner (BWA).<sup>27</sup> Aligned reads  
379 duplicating the start position of another read were flagged as duplicates and not analysed.  
380 Data was processed using the Genome Analysis ToolKit (GATK v3).<sup>28-30</sup> Reads were  
381 locally realigned around indels and their base qualities were recalibrated. Variant calling  
382 was performed on both exomes and flanking 50 base pairs of intronic sequence across all  
383 samples using the HaplotypeCaller (HC) tool from the GATK to generate a gVCF. Joint  
384 genotyping was subsequently performed and ‘raw’ variant data for each sample was  
385 formatted (variant call format (VCF)). SNVs and indel sites were initially filtered after  
386 variant calibration marked sites of low quality that were likely false positives.

387 **Data analysis QC.** Fingerprint concordance between sequence data and fingerprint  
388 genotypes was evaluated. Variant calls were evaluated on both bulk and per- sample  
389 properties: novel and known variant counts, transition–transversion (TS–TV) ratio,  
390 heterozygous–homozygous non-reference ratio, and deletion/insertion ratio. Both bulk  
391 and sample metrics were compared to historical values for exome sequencing projects at  
392 the Broad Institute. No significant deviation of from historical values was noted.

393

394 **Data processing and quality control of exome sequencing.**

395 **Variant annotation.** Variants were annotated using Variant Effect Predictor<sup>31</sup> and the  
396 LOFTEE<sup>8</sup> plugin to identify protein-truncating variants predicted to disrupt the respective  
397 gene's function with "high confidence." Each allele at polyallelic sites was separately  
398 annotated.

399 **Sample level quality control.** We performed quality control of samples using the  
400 following steps. For quality control of samples, we used bi-allelic SNVs that passed the  
401 GATK VQSR filter and were on genomic regions targeted by both ICE and Agilent  
402 exome captures. We removed samples with discordance rate > 10% between genotypes  
403 from exome sequencing with genotypes from array-based genotyping and samples with  
404 sex mismatch between inbreeding coefficient on chromosome X and fingerprinting. We  
405 tested for sample contamination using the verifyBamID software, which examines the  
406 proportion of non-reference bases at reference sites, and excluded samples with high  
407 estimated contamination (FREEMIX scores > 0.2).<sup>32</sup> After removing monozygotic twins  
408 or duplicate samples using the KING software<sup>33</sup>, we removed outlier samples with too  
409 many or too few SNVs (>17,500 total variants for Agilent-captured samples or >18,000  
410 for ICE-captured samples; <12,000 total variants; >600 singletons; and >400 doubletons).  
411 We removed those with extreme overall transition-to-transversion ratios (>4 or <3) and  
412 heterozygosity (heterozygote-to-homozygote ratio >6 or <2). Finally, we removed  
413 samples with high missingness (>0.05).

414 **Variant level quality control.** Variant score quality recalibration was performed  
415 separately for SNVs and indels use the GATK VariantRecalibrator and  
416 ApplyRecalibration to filter out variants with lower accuracy scores. To further reduce

417 the rate of inaccurate variant calls, we further filtered out SNVs with low average quality  
418 (quality per depth of coverage (QD) < 2) and a high degree of missingness (> 20 %), and  
419 indels also with low average quality (quality per depth of coverage (QD) < 3) and a high  
420 degree of missingness (> 20 %).

421

#### 422 **Methods for inbreeding analyses.**

423 **Array-derived runs of homozygosity.** Analyses were conducted in PLINK<sup>23</sup> using  
424 genome-wide association (GWAS) data in PROMIS and HapMap 3 populations.  
425 Segments of the genome that were at-least 1.5 Mb long, had a SNP density of 1 SNP per  
426 20 kb and had 25 consecutive homozygous SNPs (1 heterozygous and/or 5 missing SNPs  
427 were permitted within a segment) were defined to be in a homozygous state (or referred  
428 as “runs of homozygosity” (ROH)), as described previously.<sup>34</sup> Homozygosity was  
429 expressed as the percentage of the autosomal genome found in a homozygous state, and  
430 was calculated by dividing the sum of ROH length within each individual by the total  
431 length of the autosome in PROMIS and HapMap 3 populations respectively. To  
432 investigate variability in homozygosity explained by parental consanguinity, the  
433 difference in  $R^2$  is reported for a linear regression model of homozygosity including and  
434 excluding parental consanguinity on top of age, sex and the first 10 principal components  
435 derived from the typed autosomal GWAS data.

436 **Sequencing-derived coefficient of inbreeding.** We compared the coefficient of  
437 inbreeding distributions of 7,078 exome sequenced PROMIS participants with 15,248  
438 participants (European ancestry = 12,849, and African ancestry = 2,399) who were  
439 exome sequenced at the Broad Institute (Cambridge, MA) from the Myocardial Infarction

440 Genetics consortium.<sup>25</sup> We extracted approximately 5,000 high-quality polymorphic  
441 SNVs in linkage equilibrium present on both target intervals that passed variant quality  
442 control metrics based on HapMap 3 data.<sup>35</sup> Using PLINK, we estimated the coefficient of  
443 inbreeding separately within each ethnicity group.<sup>23</sup> The coefficient of inbreeding was  
444 estimated as the observed degree of homozygosity compared with the anticipated  
445 homozygosity derived from an estimated common ancestor.<sup>36</sup> The Wilcoxon-Mann-  
446 Whitney test was used to test whether PROMIS participants had different median  
447 coefficients of inbreeding compared to other similarly sequenced outbred individuals and  
448 whether the median coefficient of inbreeding was different between PROMIS participants  
449 who reported parental relatedness versus not. A two-sided  $P$  of 0.05 was the pre-specified  
450 threshold for statistical significance.

451

#### 452 **Methods for sequencing projection analysis.**

453 To compare the burden of unique completely inactivated genes in the PROMIS cohort  
454 with outbred cohorts of diverse ethnicities, we extracted the minor allele frequencies  
455 (maf) of "high confidence" loss-of-function mutations observed in PROMIS, and in  
456 European, African, and East Asian ancestry participants from the Exome Aggregation  
457 Consortium (ExAC r0.3; [exac.broadinstitute.org](http://exac.broadinstitute.org)). For each gene and for each ethnicity,  
458 the combined minor allele frequency (cmaf) of rare (maf < 0.1%) "high confidence" loss-  
459 of-function mutations was calculated. We then simulated the number of unique  
460 completely inactivated genes across a range of sample sizes per ethnicity and PROMIS.  
461 The expected probability of observing complete inactivation (two null copies in an  
462 individual) of a gene was calculated as  $(1 - F) * cmaf^2 + F * cmaf$ , which accounts

463 for allozygous and autozygous, respectively, mechanisms for complete genie knockout.  
464  $F$ , the inbreeding coefficient, is defined as  $F = 1 - (\text{expected heterozygosity rate} /$   
465  $\text{observed heterozygosity rate})$ . For PROMIS, the median  $F$  inbreeding coefficient  
466 (0.016) was used for estimation. Down-sampling within the observed sample size for  
467 both high-confidence null mutations and synonymous variants did not deviate  
468 significantly from the expected trajectory. For a range of sample sizes (0-200,000), each  
469 gene was randomly sampled under a binomial distribution ( $X \sim B(n, cmaf)$ ) and it was  
470 determined if the gene was successfully sampled at least once. To refine the estimated  
471 count of unique genes per sample size, each sampling was replicated ten times.

472

#### 473 **Methods for constraint score analysis.**

474 We sought to determine whether the observed homozygous null genes were under less  
475 evolutionary constraint by first obtaining constraint loss of function constraint scores  
476 derived from the Exome Aggregation Consortium (Lek M et al, in preparation).<sup>9,10</sup>  
477 Briefly, we used the number of observed and expected rare (MAF < 0.1%) loss of  
478 function variants per gene to determine to which of three classes it was likely to belong:  
479 null (observed variation matches expectation), recessive (observed variation is ~50%  
480 expectation), or haploinsufficient (observed variation is <10% of expectation). The  
481 probability of being loss of function intolerant (pLI) of each transcript was defined as the  
482 probability of that transcript falling into the haploinsufficient category. Transcripts with a  
483  $pLI \geq 0.9$  are considered very likely to be loss of function intolerant; those with  $pLI \leq 0.1$   
484 are not likely to be loss of function intolerant. A list of 961 genes were randomly sampled  
485 from a list of sequenced genes 1,000 times and the proportion of loss of function

486 intolerant genes compared to the proportion of the observed homozygous null genes was  
487 compared using the chi square test. The likelihood that the distribution of the test  
488 statistics deviated from the null was ascertained.

489

#### 490 **Methods for rare variant association analysis.**

491 **Recessive model association discovery.** We sought to determine whether complete loss-  
492 of-function of a gene was associated with a dense array of phenotypes. We extracted a list  
493 of individuals per gene who were homozygous for a high confidence null allele that was  
494 rare (minor allele frequency < 1 %) in the cohort. From a list of 961 genes where there  
495 was at least one participant homozygous null and a list of 201 traits, we initially  
496 considered 192,960 gene-trait pairings. To reduce the likelihood of false positives, we  
497 only considered gene-trait pairs where there were at least two homozygous nulls per gene  
498 phenotyped for a given trait yielding 15,263 gene-trait pairs for analysis.

499 For all analyses, we constructed generalized linear models to test whether complete loss  
500 of function versus non-carriers was associated with trait variation. A logit link was used  
501 for binomial outcomes. Right-skewed continuous traits were natural log transformed.  
502 Age, sex, and myocardial infarction status were used as covariates in all analyses. We  
503 extracted principal components of ancestry using EIGENSTRAT to control for  
504 population stratification in all analyses.<sup>37</sup> For lipoprotein-related traits, the use of lipid-  
505 lowering therapy was used as a covariate. For glycemic biomarkers, only non-diabetics  
506 were used in the analysis. The  $P$  threshold for statistical significance was  $0.05 / 15,263 =$   
507  $3 \times 10^{-6}$ .

508 **Heterozygote association replication.** We hypothesized that some of the associations  
509 for homozygous nulls will display a more modest effect for heterozygous nulls. Thus, the  
510 aforementioned analyses were performed comparing heterozygous nulls to non-carriers  
511 for the fourteen homozygous null-trait associations that surpassed prespecified statistical  
512 significance. A  $P$  of  $0.05 / 13 = 0.004$  was set for statistical significance for these  
513 restricted analyses.

514 **Association for single genic homozygotes.** We performed an exploratory analysis of  
515 gene-trait pairs where there was only one phenotyped homozygous null. We performed  
516 the above association analyses for genes where there was only one homozygous null  
517 phenotyped for a given trait and we focused on those with the most extreme standard  $Z$   
518 score statistics ( $|Z \text{ score}| > 5$ ) from the primary association analysis and required that  
519 there to also be nominal evidence for association ( $P < 0.05$ ) in heterozygotes as well to  
520 maximize confidence in an observed single homozygous null-trait association.

521

522 **Methods for recruitment and phenotyping of an *APOC3* p.Arg19Ter proband and**  
523 **relatives.**

524 **Methods for Sanger sequencing.** We collected blood samples from a total of 28  
525 subjects, including one of the four *APOC3* p.Arg19Ter homozygous participants along  
526 with 27 of his family and community members for DNA extraction and separated into  
527 plasma for lipid and apolipoprotein measurements. All subjects were consented prior to  
528 initiation of the studies (IRB: 00007048 at the Center for Non-Communicable Diseases,  
529 Paksitan). DNA was isolated from whole blood using a reference phenol-chloroform  
530 protocol.<sup>38</sup> Genotypes for the p.Arg19Ter variant were determined in all 28 participants



531 by Sanger sequencing. A 685 bp region of the *APOC3* gene including the base position  
532 for this variant was amplified by PCR (Expand HF PCR Kit, Roche) using the following  
533 primer sequences: Forward primer CTCCTTCTGGCAGACCCAGCTAAGG, Reverse  
534 primer CCTAGGACTGCTCCGGGGAGAAAG. PCR products were purified with Exo-  
535 SAP-IT (Affymetrix) and sequenced via Sanger sequencing using the same primers.

536 **Oral fat tolerance test.** Six non-carriers and seven homozygotes also participated in an  
537 oral fat tolerance test. Participants fasted overnight and then blood was drawn for  
538 measurement of baseline fasted lipids. Following this, participants were administered an  
539 oral load of heavy cream (50 g fat per square meter of body surface area as calculated by  
540 the method of Mosteller<sup>39</sup>). Participants consumed this oral load within a time span of 20  
541 minutes and afterwards consumed 200 mL of water. Blood was drawn at 2, 4, and 6 hours  
542 after oral fat consumption as done previously.<sup>40,41</sup> All lipid and apolipoprotein  
543 measurements from these plasma samples were determined by immunoturbidimetric  
544 assays on an ACE Axcel Chemistry analyzer (Alfa Wasserman). A comparisons of area-  
545 under-the curve triglycerides was performed between *APOC3* p.Arg19Ter homozygotes  
546 and non-carriers using a two independent sample Student's t test;  $P < 0.05$  was  
547 considered statistically significant.

548

549 **Tables**

550 **Table 1. Baseline characteristics of exome sequenced study participants.**

| <b>Characteristic</b>                               | <b>Value</b>       |
|-----------------------------------------------------|--------------------|
|                                                     | <b>(n = 7,078)</b> |
| <b>Age (yrs) – mean (sd)</b>                        | 50.7 (9.1)         |
| <b>Women – no. (%)</b>                              | 1,249 (17.6 %)     |
| <b>Parents closely related – no. (%)</b>            | 2,710 (38.3 %)     |
| <b>Spouse closely related – no. (%)</b>             | 2,697 (38.1 %)     |
| <b>Ethnicity – no. (%)</b>                          |                    |
| <b>Urdu</b>                                         | 2,647 (37.4 %)     |
| <b>Punjabi</b>                                      | 2,332 (32.9 %)     |
| <b>Sindhi</b>                                       | 797 (11.3 %)       |
| <b>Pathan</b>                                       | 416 (5.9 %)        |
| <b>Memon</b>                                        | 108 (1.5 %)        |
| <b>Gujrati</b>                                      | 89 (1.3 %)         |
| <b>Balochi</b>                                      | 85 (1.2 %)         |
| <b>Other</b>                                        | 604 (8.5 %)        |
| <b>Hypertension – no. (%)<sup>*</sup></b>           | 3,936 (55.6 %)     |
| <b>Hypercholesterolemia – no. (%)<sup>†</sup></b>   | 1,857 (26.2 %)     |
| <b>Diabetes mellitus – no. (%)<sup>‡</sup></b>      | 2,904 (41.0 %)     |
| <b>Coronary heart disease – no. (%)<sup>§</sup></b> | 3,046 (43.0 %)     |
| <b>Smoking – no. (%)<sup>  </sup></b>               | 2,814 (39.8 %)     |

---

|                                           |            |
|-------------------------------------------|------------|
| <b>BMI (m/kg<sup>2</sup>) – mean (sd)</b> | 25.9 (4.3) |
|-------------------------------------------|------------|

---

551 \*Hypertension defined as systolic blood pressure  $\geq$ 140 mmHg, diastolic blood pressure

552  $\geq$ 90 mmHg, or antihypertensive treatment.

553 †Hypercholesterolemia defined as serum total cholesterol >240 mg/dL, lipid lowering

554 therapy or self-report.

555 ‡Diabetes defined as fasting blood glucose  $\geq$ 126 mg/dL, or HbA1c >6.5 %, oral

556 hypoglycemics, insulin treatment, or self-report.

557 §Coronary heart disease defined as history of myocardial infarction as determined by

558 clinical symptoms with typical EKG findings or elevated serum troponin I.

559 ||Smoking defined as active current or prior tobacco smoking.

560

561 **Figure Legends**

562 **Fig 1.** Consanguinity leads to regions of genomic segments that are identical by descent  
563 and can be observed as runs of homozygosity. Using genome-wide array data in 17,744  
564 PROMIS participants and reference samples from the International HapMap 3, the  
565 burden of runs of homozygosity (minimum 1.5 Mb) per individual was derived and  
566 population-specific distributions are displayed, with outliers removed. This highlights the  
567 higher median runs of homozygosity burden in PROMIS and the higher proportion of  
568 individuals with very high burdens.

569

570 **Fig 2.** The site-frequency spectrum of synonymous, missense, and high-confidence null  
571 mutations is represented. Points represent the proportion of variants within a  $1 \times 10^{-4}$   
572 minor allele frequency bin for each variant category. Lines represent the cumulative  
573 proportions of variants categories. The bottom inset highlights that most null variants are  
574 often seen in no more than one or two individuals. The top inset highlights that virtually  
575 all null mutations are very rare.

576

577 **Fig 3. a,** The distribution of F inbreeding coefficient of PROMIS participants is  
578 compared to those of outbred samples of African (AFR) and European (EUR) ancestry.  
579 **b,** The burden of homozygous null genes per individual is correlated with coefficient of  
580 inbreeding.

581

582 **Fig 4. a.-d.** Among all sequenced participants, apolipoprotein C-III, triglycerides, HDL  
583 cholesterol and LDL cholesterol distributions are displayed by *APOC3* null genotype

584 status. Apolipoprotein C-III concentration is displayed on a logarithmic base 10 scale. **e.**  
585 One of the four *APOC3* null homozygotes and several family members were recruited for  
586 genotyping *APOC3* p.Arg19Ter. The proband was married to another null homozygote  
587 and has nine obligate homozygote children. Given the extensive first-degree unions, the  
588 pedigree is simplified for clarity. **f.** *APOC3* p.Arg19Ter homozygotes and non-carriers  
589 within the recruited family participated in an oral 50 g/m<sup>2</sup> fat tolerance test. Homozygotes  
590 had decreased baseline and post-prandial triglyceride concentrations.

591

592 **Fig 5.** The anticipated number of unique homozygous null genes observed with  
593 increasing sample sizes sequenced in PROMIS compared with similar African (AFR) and  
594 European (EUR) sample sizes using observed allele frequencies and degree of  
595 inbreeding.

596 **Figures**

597

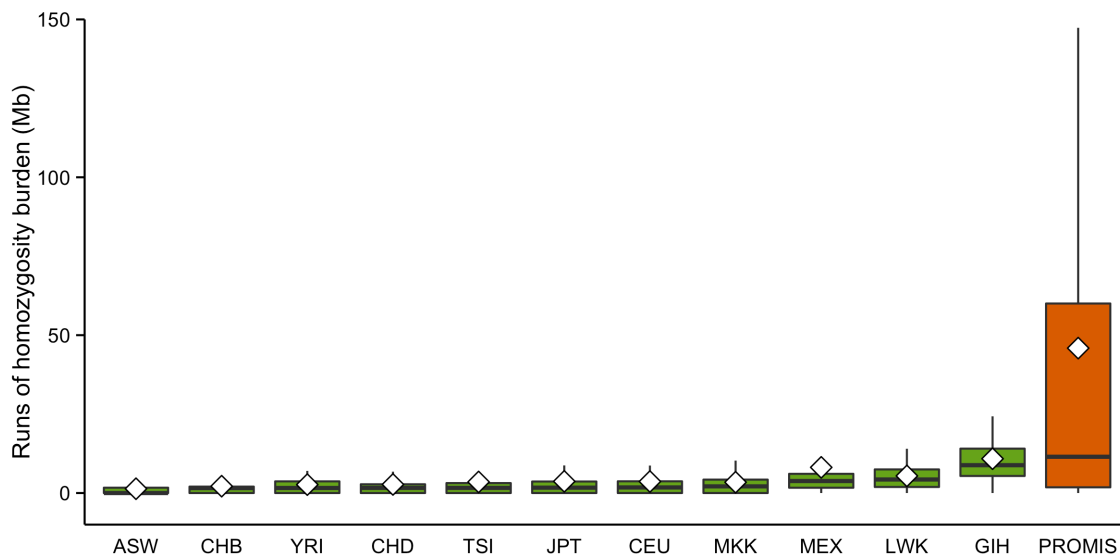

598

599

**Fig 1. PROMIS participants have an excess burden of runs of homozygosity**

600

**compared with other populations.**

601

602

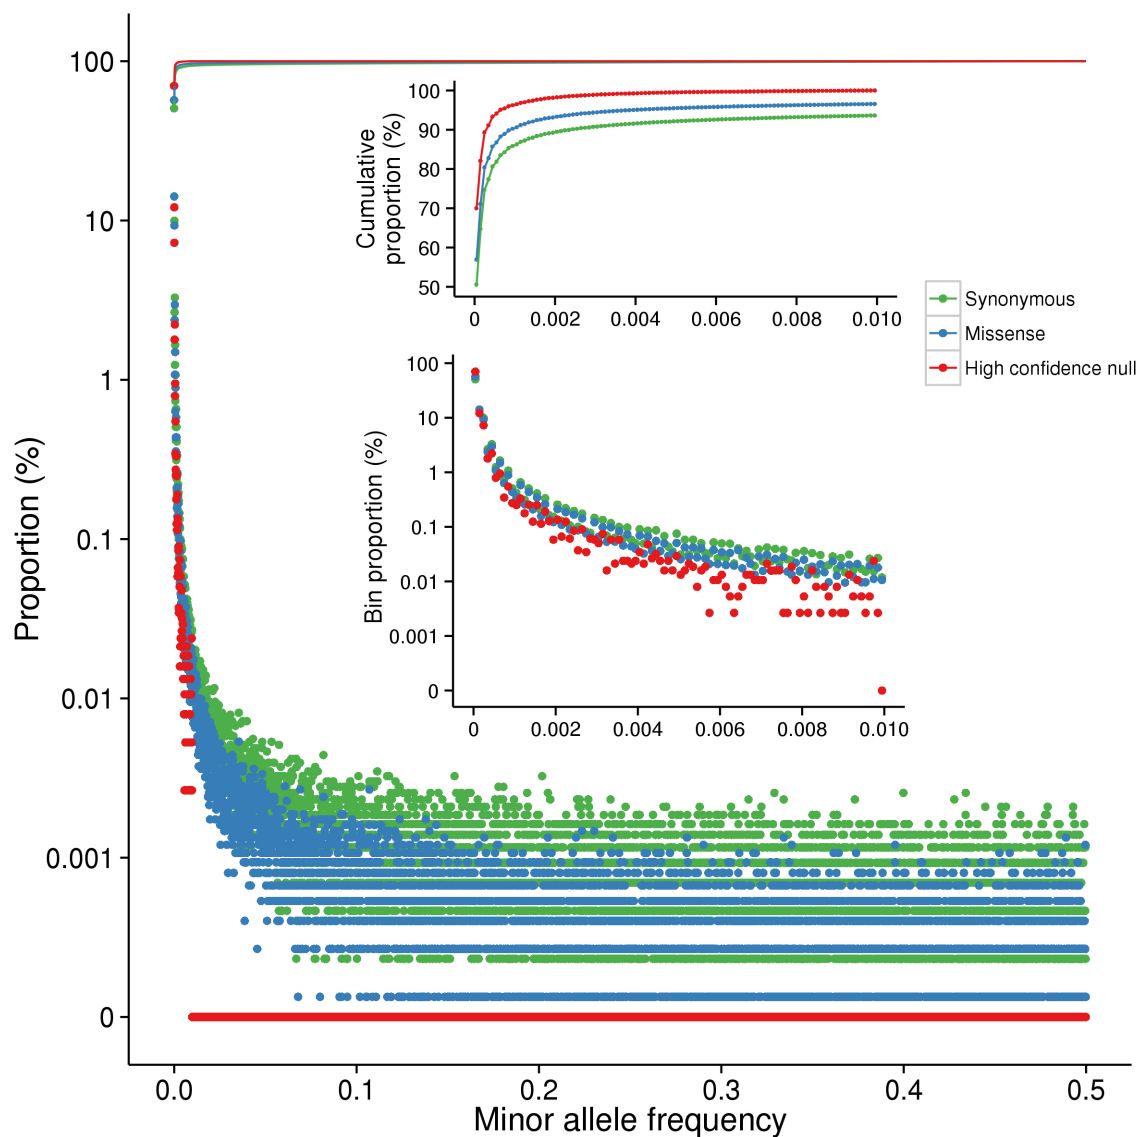

603

604 **Fig 2. Null mutations are typically seen in very few individuals.**

605

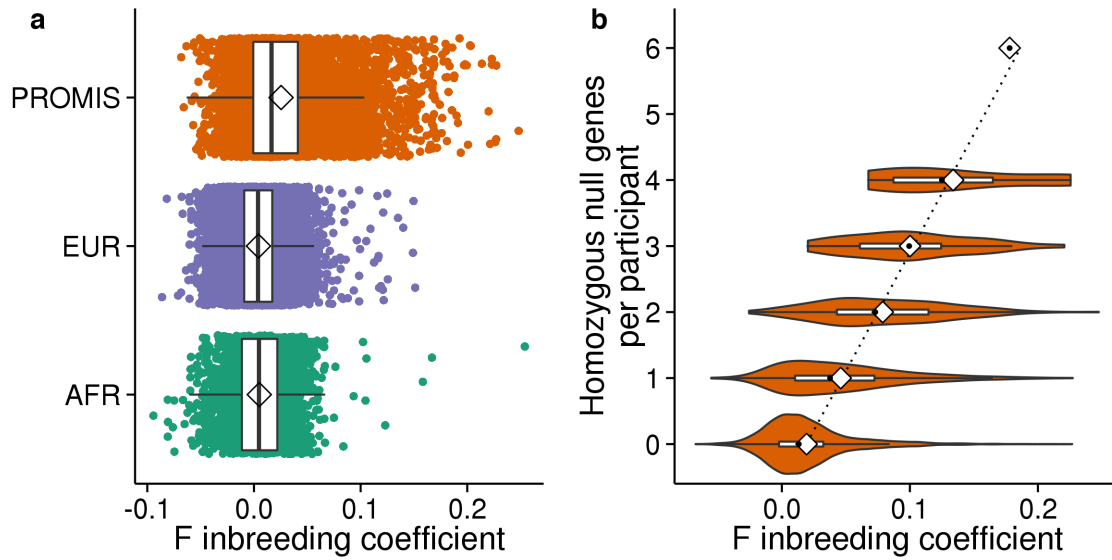

606

607 **Fig. 3. Homozygous null burden in PROMIS is driven by excess autozygosity.**

608



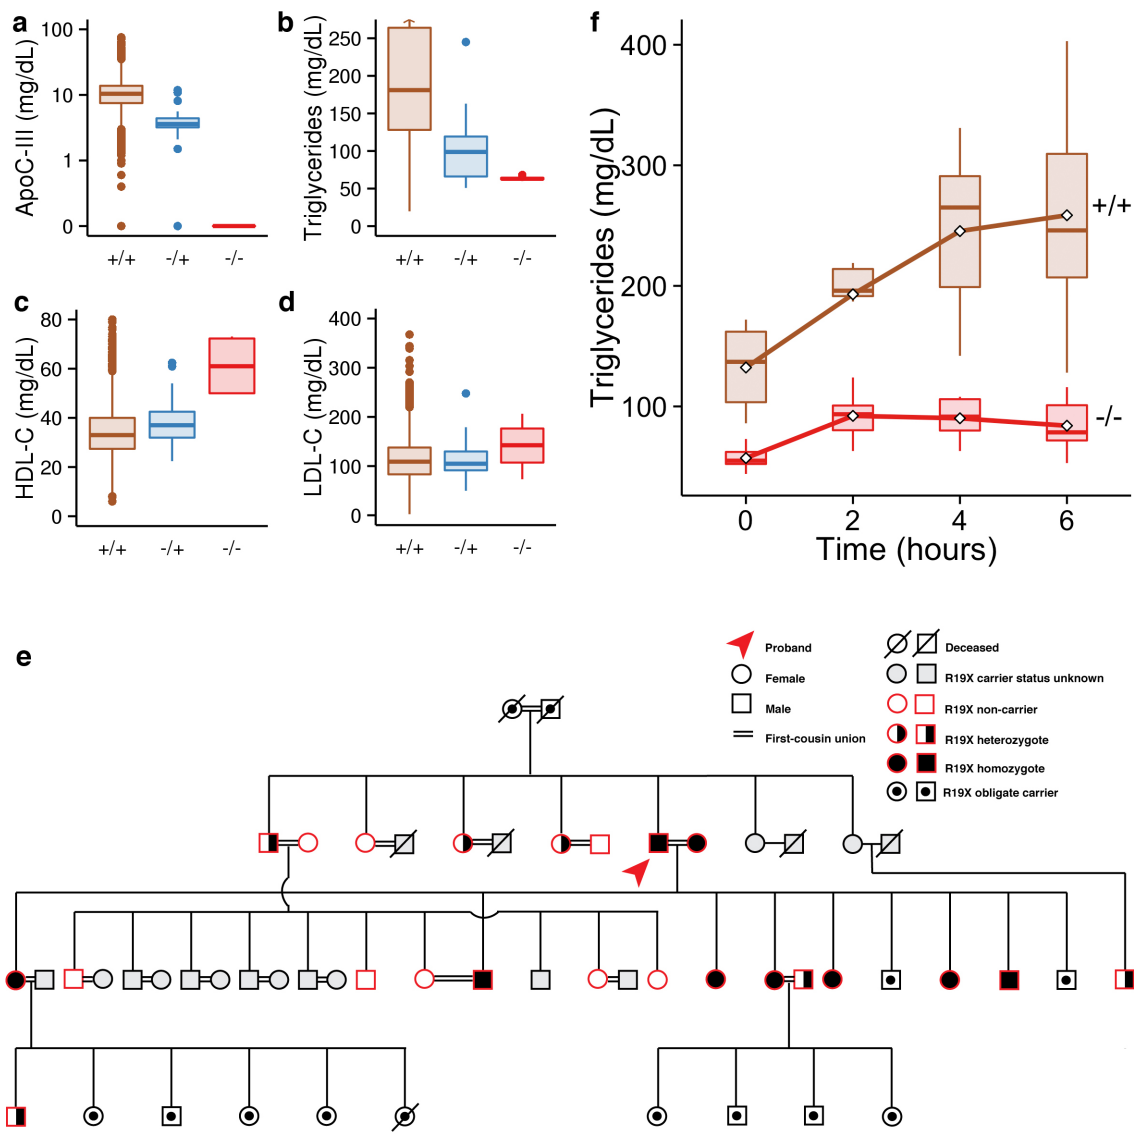

609

610

611 **Fig 4. *APOC3* null homozygotes have diminished fasting triglycerides and blunted**

612 **post-prandial lipemia.**

613

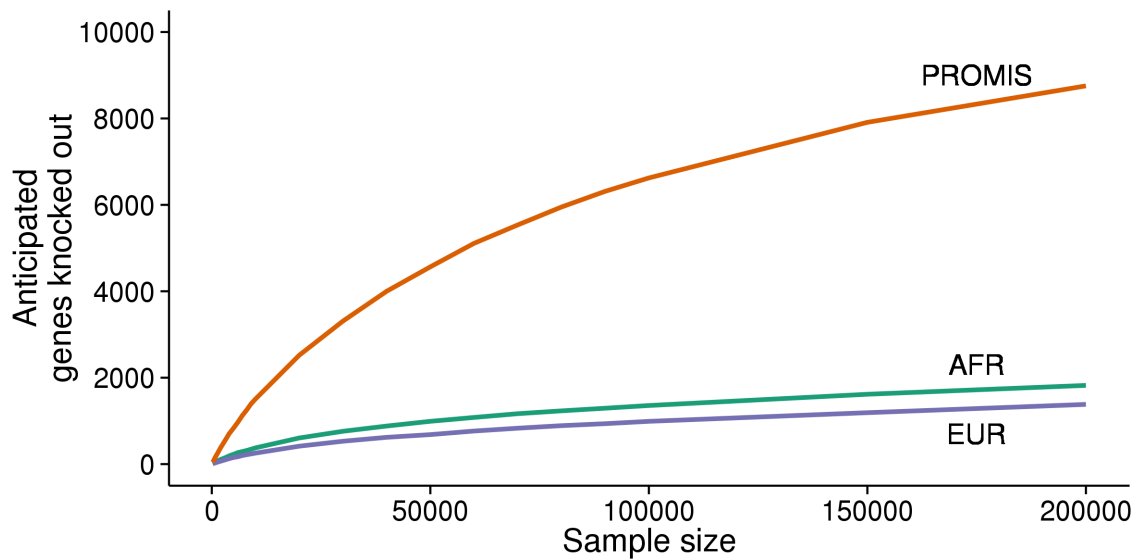

614

615 **Fig 5. Simulations anticipate many more homozygous null genes in the PROMIS**

616 **cohort.**

617 **References**

- 618 1 Eisenberg, D., Marcotte, E. M., Xenarios, I. & Yeates, T. O. Protein function in  
619 the post-genomic era. *Nature* **405**, 823-826, doi:10.1038/35015694 (2000).
- 620 2 MacArthur, D. G. *et al.* A systematic survey of loss-of-function variants in human  
621 protein-coding genes. *Science* **335**, 823-828, doi:10.1126/science.1215040 (2012).
- 622 3 Sulem, P. *et al.* Identification of a large set of rare complete human knockouts.  
623 *Nat Genet*, doi:10.1038/ng.3243 (2015).
- 624 4 Bittles, A. H., Mason, W. M., Greene, J. & Rao, N. A. Reproductive behavior and  
625 health in consanguineous marriages. *Science* **252**, 789-794 (1991).
- 626 5 Saleheen, D. *et al.* The Pakistan Risk of Myocardial Infarction Study: a resource  
627 for the study of genetic, lifestyle and other determinants of myocardial infarction  
628 in South Asia. *European Journal of Epidemiology* **24**, 329-338,  
629 doi:10.1007/s10654-009-9334-y (2009).
- 630 6 Modell, B. & Darr, A. Science and society: genetic counselling and customary  
631 consanguineous marriage. *Nat Rev Genet* **3**, 225-229, doi:10.1038/nrg754 (2002).
- 632 7 Lander, E. S. & Botstein, D. Homozygosity mapping: a way to map human  
633 recessive traits with the DNA of inbred children. *Science* **236**, 1567-1570 (1987).
- 634 8 Karczewski, K. J. *LOFTEE (Loss-Of-Function Transcript Effect Estimator)*,  
635 <<https://github.com/konradjk/loftee>> (2015).
- 636 9 De Rubeis, S. *et al.* Synaptic, transcriptional and chromatin genes disrupted in  
637 autism. *Nature* **515**, 209-215, doi:10.1038/nature13772 (2014).
- 638 10 Samocha, K. E. *et al.* A framework for the interpretation of de novo mutation in  
639 human disease. *Nat Genet* **46**, 944-950, doi:10.1038/ng.3050 (2014).

- 640 11 Finn, A. V., Nakano, M., Narula, J., Kolodgie, F. D. & Virmani, R. Concept of  
641 vulnerable/unstable plaque. *Arterioscler Thromb Vasc Biol* **30**, 1282-1292,  
642 doi:10.1161/ATVBAHA.108.179739 (2010).
- 643 12 Carr, B. A., Wan, J., Hines, R. N. & Yost, G. S. Characterization of the human  
644 lung CYP2F1 gene and identification of a novel lung-specific binding motif. *The*  
645 *Journal of Biological Chemistry* **278**, 15473-15483, doi:10.1074/jbc.M300319200  
646 (2003).
- 647 13 Standiford, T. J. *et al.* Interleukin-8 gene expression by a pulmonary epithelial  
648 cell line. A model for cytokine networks in the lung. *The Journal of Clinical*  
649 *Investigation* **86**, 1945-1953, doi:10.1172/JCI114928 (1990).
- 650 14 Christiansen, D. *et al.* Humans lack iGb3 due to the absence of functional iGb3-  
651 synthase: implications for NKT cell development and transplantation. *PLoS*  
652 *Biology* **6**, e172, doi:10.1371/journal.pbio.0060172 (2008).
- 653 15 Dahl, K., Buschard, K., Gram, D. X., d'Apice, A. J. & Hansen, A. K. Glucose  
654 intolerance in a xenotransplantation model: studies in alpha-gal knockout mice.  
655 *APMIS : Acta Pathologica, Microbiologica, et Immunologica Scandinavica* **114**,  
656 805-811, doi:10.1111/j.1600-0463.2006.apm\_393.x (2006).
- 657 16 Casu, A. *et al.* Insulin secretion and glucose metabolism in alpha 1,3-  
658 galactosyltransferase knock-out pigs compared to wild-type pigs.  
659 *Xenotransplantation* **17**, 131-139, doi:10.1111/j.1399-3089.2010.00572.x (2010).
- 660 17 Schneider, M. R. & Wolf, E. The epidermal growth factor receptor ligands at a  
661 glance. *Journal of Cellular Physiology* **218**, 460-466, doi:10.1002/jcp.21635  
662 (2009).

- 663 18 Wang, G. X. *et al.* The brown fat-enriched secreted factor Nrg4 preserves  
664 metabolic homeostasis through attenuation of hepatic lipogenesis. *Nature*  
665 *Medicine* **20**, 1436-1443, doi:10.1038/nm.3713 (2014).
- 666 19 Huff, M. W. & Hegele, R. A. Apolipoprotein C-III: going back to the future for a  
667 lipid drug target. *Circ Res* **112**, 1405-1408,  
668 doi:10.1161/CIRCRESAHA.113.301464 (2013).
- 669 20 Tg *et al.* Loss-of-function mutations in APOC3, triglycerides, and coronary  
670 disease. *N Engl J Med* **371**, 22-31, doi:10.1056/NEJMoa1307095 (2014).
- 671 21 Jorgensen, A. B., Frikke-Schmidt, R., Nordestgaard, B. G. & Tybjaerg-Hansen,  
672 A. Loss-of-function mutations in APOC3 and risk of ischemic vascular disease. *N*  
673 *Engl J Med* **371**, 32-41, doi:10.1056/NEJMoa1308027 (2014).
- 674 22 Kooner, J. S. *et al.* Genome-wide association study in individuals of South Asian  
675 ancestry identifies six new type 2 diabetes susceptibility loci. *Nat Genet* **43**, 984-  
676 989, doi:10.1038/ng.921 (2011).
- 677 23 Purcell, S. *et al.* PLINK: a tool set for whole-genome association and population-  
678 based linkage analyses. *American Journal of Human Genetics* **81**, 559-575,  
679 doi:10.1086/519795 (2007).
- 680 24 Tennessen, J. A. *et al.* Evolution and functional impact of rare coding variation  
681 from deep sequencing of human exomes. *Science* **337**, 64-69,  
682 doi:10.1126/science.1219240 (2012).
- 683 25 Do, R. *et al.* Exome sequencing identifies rare LDLR and APOA5 alleles  
684 conferring risk for myocardial infarction. *Nature*, doi:10.1038/nature13917  
685 (2014).

- 686 26 Fisher, S. *et al.* A scalable, fully automated process for construction of sequence-  
687 ready human exome targeted capture libraries. *Genome Biology* **12**, R1,  
688 doi:10.1186/gb-2011-12-1-r1 (2011).
- 689 27 Li, H. & Durbin, R. Fast and accurate short read alignment with Burrows-Wheeler  
690 transform. *Bioinformatics* **25**, 1754-1760, doi:10.1093/bioinformatics/btp324  
691 (2009).
- 692 28 McKenna, A. *et al.* The Genome Analysis Toolkit: a MapReduce framework for  
693 analyzing next-generation DNA sequencing data. *Genome Research* **20**, 1297-  
694 1303, doi:10.1101/gr.107524.110 (2010).
- 695 29 DePristo, M. A. *et al.* A framework for variation discovery and genotyping using  
696 next-generation DNA sequencing data. *Nat Genet* **43**, 491-498,  
697 doi:10.1038/ng.806 (2011).
- 698 30 Van der Auwera, G. A. *et al.* From FastQ data to high confidence variant calls:  
699 the Genome Analysis Toolkit best practices pipeline. *Current Protocols in*  
700 *Bioinformatics* **11**, 11 10 11-11 10 33, doi:10.1002/0471250953.bi1110s43  
701 (2013).
- 702 31 McLaren, W. *et al.* Deriving the consequences of genomic variants with the  
703 Ensembl API and SNP Effect Predictor. *Bioinformatics* **26**, 2069-2070,  
704 doi:10.1093/bioinformatics/btq330 (2010).
- 705 32 Jun, G. *et al.* Detecting and estimating contamination of human DNA samples in  
706 sequencing and array-based genotype data. *American Journal of Human Genetics*  
707 **91**, 839-848, doi:10.1016/j.ajhg.2012.09.004 (2012).

- 708 33 Manichaikul, A. *et al.* Robust relationship inference in genome-wide association  
709 studies. *Bioinformatics* **26**, 2867-2873, doi:10.1093/bioinformatics/btq559 (2010).
- 710 34 Hunter-Zinck, H. *et al.* Population genetic structure of the people of Qatar.  
711 *American Journal of Human Genetics* **87**, 17-25, doi:10.1016/j.ajhg.2010.05.018  
712 (2010).
- 713 35 Purcell, S. M. *et al.* A polygenic burden of rare disruptive mutations in  
714 schizophrenia. *Nature* **506**, 185-190, doi:10.1038/nature12975 (2014).
- 715 36 Wright, S. Coefficients of inbreeding and relationship. *Am Nat* **56**, 330-338  
716 (1922).
- 717 37 Price, A. L. *et al.* Principal components analysis corrects for stratification in  
718 genome-wide association studies. *Nat Genet* **38**, 904-909, doi:10.1038/ng1847  
719 (2006).
- 720 38 Sambrook, J. & Russell, D. W. Purification of nucleic acids by extraction with  
721 phenol:chloroform. *CSH protocols* **2006**, doi:10.1101/pdb.prot4455 (2006).
- 722 39 Mosteller, R. D. Simplified calculation of body-surface area. *N Engl J Med* **317**,  
723 1098, doi:10.1056/NEJM198710223171717 (1987).
- 724 40 Maraki, M. *et al.* Validity of abbreviated oral fat tolerance tests for assessing  
725 postprandial lipemia. *Clinical Nutrition* **30**, 852-857,  
726 doi:10.1016/j.clnu.2011.05.003 (2011).
- 727 41 Pollin, T. I. *et al.* A null mutation in human APOC3 confers a favorable plasma  
728 lipid profile and apparent cardioprotection. *Science* **322**, 1702-1705,  
729 doi:10.1126/science.1161524 (2008).
- 730

731 **Supplementary Information** is linked to the online version of the paper at

732 [www.nature.com/nature](http://www.nature.com/nature).

733

734 **Acknowledgements** Dr. Saleheen is supported by grants from the National Institutes of

735 Health, the Fogarty International, the Wellcome Trust, the British Heart Foundation, and

736 Pfizer. Dr. Natarajan is supported by the John S. LaDue Memorial Fellowship in

737 Cardiology from Harvard Medical School. Dr. Kathiresan is supported by grants from the

738 National Institutes of Health (R01HL107816), the Donovan Family Foundation, and

739 Fondation Leducq. Exome sequencing was supported by a grant from the NHGRI

740 (5U54HG003067-11) to Drs. Gabriel and Lander. Dr. MacArthur is supported by a grant

741 from the National Institutes of Health (R01GM104371). In recognition for PROMIS

742 fieldwork and support, we also acknowledge contributions made by the following:

743 Mohammad Zeeshan Ozair, Usman Ahmed, Abdul Hakeem, Hamza Khalid, Kamran

744 Shahid, Fahad Shuja, Ali Kazmi, Mustafa Qadir Hameed, Naeem Khan, Sadiq Khan,

745 Ayaz Ali, Madad Ali, Saeed Ahmed, Muhammad Waqar Khan, Muhammad Razaq Khan,

746 Abdul Ghafoor, Mir Alam, Riazuddin, Muhammad Irshad Javed, Abdul Ghaffar, Tanveer

747 Baig Mirza, Muhammad Shahid, Jabir Furqan, Muhammad Iqbal Abbasi, Tanveer Abbas,

748 Rana Zulfqar, Muhammad Wajid, Irfan Ali, Muhammad Ikhtlaq, Danish Sheikh,

749 Muhammad Imran, Matthew Walker, Nadeem Sarwar, Sarah Venorman, Robin Young,

750 Adam Butterworth, Hannah Lombardi, Binder Kaur and Nasir Sheikh. Fieldwork in the

751 PROMIS study has been supported through funds available to investigators at the Center

752 for Non-Communicable Diseases, Pakistan and the University of Cambridge, UK.

753



754

755 **Author Contributions** Sample recruitment and phenotyping was performed by D.S.,  
756 P.F., J.D., A.R., M.Z., M.S., M.F., A.I., N.K.S., S.A., F.M., M.I., S.A., K.T., N.H.M.,  
757 K.S.Z., N.Q., M.I., S.Z.R., F.M., K.M., and N.A.. D.S., P.F., J.D., and W.Z. performed  
758 array-based genotyping and runs-of-homozygosity analyses. Exome sequencing was  
759 coordinated by D.S., N.G., S.G., E.S.L., D.J.R., and S.K.. P.N., W.Z., H.H.W., and R.D.  
760 performed exome sequencing quality control and association analyses. P.N., K.J.K.,  
761 A.H.O., and D.G.M. performed variant annotation. D.S., S.K. and D.J.R. performed  
762 confirmatory genotyping and lipoprotein biomarker assays. D.S. and A.R. conducted  
763 recall based studies for the APOC3 knockouts. P.N. and M.J.D. performed bioinformatics  
764 simulations. P.N. and K.E.S. performed constraint score analyses. D.S., P.N., and S.K.  
765 designed the study and wrote the paper. D.S. and P.N. contributed equally. All authors  
766 discussed the results and commented on the manuscript.

767

768 **Author Information** Summaries of all null variants observed in a homozygous are in the  
769 online Supplement. They are additionally, with all observed protein-coding variation,  
770 publicly available in the Exome Aggregation Consortium browser  
771 ([exac.broadinstitute.org](http://exac.broadinstitute.org)). Reprints and permissions information is available at  
772 [www.nature.com/reprints](http://www.nature.com/reprints). The authors do not declare competing financial interests.  
773 Correspondence and requests for materials should be addressed to D.S. or S.K.  
774 ([saleheen@mail.med.upenn.edu](mailto:saleheen@mail.med.upenn.edu) or [sekar@broadinstitute.org](mailto:sekar@broadinstitute.org)).
